# Supplementary material for: Facile synthesis of multinuclear complexes based on a tetra(4-pyridyl)amidinate dirhodium(ii) dimer
Source: Royal Society of Chemistry journal article supplement (doi:10.1039/b715205a), 2007-12-13
Supplement: b715205a.pdf [file b715205a.pdf]

## Electronic Supplementary Information

### Facile synthesis of multinuclear complexes based on a tetra (4-pyridyl)amidinate dirhodium(II) dimer

Daniel Chartrand and Garry S. Hanan\*

Département de Chimie, Université de Montréal, Montréal, Québec, H3T-1J4, Canada

#### Preparation of tetra(*N,N'*-diphenyl-isonicotinamidate) dirhodium (1):

Twenty-four equivalents of *N,N'*-diphenyl-isonicotinamidine (3.06 g, 11,2 mmol) were melted at 195° C and one equivalent (231,4 mg, 0.457 mmol) of dimethanol dirhodium tetraacetate was added to the stirred liquid. The temperature was maintained at 195° C for 5 minutes, then the liquid was left to solidify and was cooled back to room temperature. After extraction in dichloromethane, the product was purified by flash column chromatography on silica gel (eluant: 3 hexanes: 2 acetone (v/v); flashed with ethyl acetate) **1** was obtained in 15% yield (80.9 mg, 0.0625 mmol).

<sup>1</sup>H NMR (400 MHz, DMSO at 388K) ppm 8.14 (d, J = 3.7 Hz, 1H), 7.05 (t, J = 7.5, 2H), 6.98 (t, J = 7.2 Hz, 1H), 6.70 (d, J = 5.6 Hz, 2H).

High-res mass spec. for [C<sub>72</sub>H<sub>56</sub>N<sub>12</sub>Rh<sub>2</sub>+H]<sup>+</sup>: calculated m/z: 1295.2934; measured m/z: 1295.2876.

#### Preparation of tetra(*N''*-(2,2'-bipyridinetricarbonyl-rhenium(I))-*N,N'*-diphenyl-isonicotinamidate)dirhodium(II) (2):

To a THF (5 mL) solution containing four equivalents of [Re(bpy)(CO)<sub>3</sub>(NCCH<sub>3</sub>)]PF<sub>6</sub> (86,6 mg, 0.141 mmol) was added one equivalent of **1** (42.3 mg, .0326 mmol) then the solution was heated at reflux for 1 hour. Complex **2** precipitated out of the solution affording a green solid in 59% yield (69.4 mg, 0.0194 mmol).

<sup>1</sup>H NMR (400 MHz, DMSO at r.t) ppm 9.07 (d, J = 5.1 Hz, 1H), 9.13 (d, J = 5.1 Hz, 1H), 8.65 (d, J = 8.0 Hz, 1H), 8.59 (d, J = 8.1 Hz, 1H), 8.39 (t, J = 7.7 Hz, 1H), 8.33 (t, J = 7.7 Hz, 1H), 7.97 (d, J = 5.9 Hz, 2H), 7.87 (d, J = 6.6 Hz, 1H), 7.78-7.70 (t, 6.6 Hz, 1H), 6.94 (t, J = 7.1Hz, 2H), 6.81 (t, J = 7.3 Hz, 4H), 6.33 (d, J = 5.8 Hz, 2H), 6.07 (broad, 2H), 5.32 (broad, 2H).

High-res mass for [C<sub>124</sub>H<sub>88</sub>N<sub>20</sub>O<sub>12</sub>Rh<sub>2</sub>Re<sub>4</sub>P<sub>2</sub>F<sub>12</sub>]<sup>2+</sup>: calculated m/z: 1646.1252; measured m/z: 1646.1201.
